# Supplementary material for: Genoarchitecture of the Early Postmitotic Pretectum and the Role of Wnt Signaling in Shaping Pretectal Neurochemical Anatomy in Zebrafish
Source: Frontiers journal article supplement (doi:10.3389/fnana.2022.838567), 2022-03-09
Supplement: Data_Sheet_1.pdf [file Data_Sheet_1.pdf]

**Table. S1. Probes used in the in situ hybridisation staining**

| Probe name                        | Reference            | NCBI number    |
|-----------------------------------|----------------------|----------------|
| <i>dbx1a</i>                      | Present results      | NM_131158.1    |
| <i>gbx2</i>                       |                      | NM_152964.1    |
| <i>lef1</i>                       |                      | NM_131426.1    |
| <i>lef1</i>                       | Dorsky et al., 1999  | NM_131426.1    |
| <i>tcf7l2</i>                     | Li et al., 2009      | NM_131259.1    |
| <i>shha</i>                       | Krauss et al., 1993  | NM_131063.3    |
| <i>ascla</i>                      | Flasse et al., 2013  | NM_131219.1    |
| <i>lhx9</i>                       | Peukert et al., 2011 | NM_001017710.2 |
| <i>gad1b</i>                      | Schollp et al., 2009 | NM_194419.1    |
| <i>vglut2.2</i>                   |                      | NM_001009982.1 |
| <i>nkx2.2a</i>                    | Corallo et al., 2013 | NM_001308640.1 |
| <i>pax6a</i>                      | Veien et al., 2008   | NM_131304.1    |
| <i>pou4f1</i><br>( <i>brn3a</i> ) | Aizawa et al., 2005  | NM_001312866.2 |
| <i>pax7a</i>                      | Seo et al., 1998     | NM_131325.2    |

**Table S2. Primers used in cloning RNA probes for *in situ* hybridisation.** Green - sequence designed in IDS, red - restriction side for enzymes, black - additional nucleotide necessary for enzymes attachment.

| Gene                  | Primer sequences                 |
|-----------------------|----------------------------------|
| <i>lef1</i> _forward  | AGAATTCATGCAGCTTTACCCAGGATGGT    |
| <i>lef1</i> _reverse  | AATGTCGACCTGCAGCCGAGGAGCAGATT    |
| <i>gbx2</i> _forward  | AGAATTCCAAATCGCGCACGCCTTAAA      |
| <i>gbx2</i> _reverse  | AATGTCGACCAGCCAAACTGTCACTTGTTTCC |
| <i>dbx1a</i> _forward | AGAATTCCTCCAAGGAGAGGGAGTTGCTTT   |
| <i>dbx1a</i> _reverse | AATGTCGACGTGAACCATAACGTGGTTGAACA |

**Table. S3. Antibodies used in the research and their dilutions.** IF – immunofluorescence, WM – whole mount immunostaining

| Antibody         | Antigen                               | Host   | Dilution                      | Producer<br>Catalog number           | Application |
|------------------|---------------------------------------|--------|-------------------------------|--------------------------------------|-------------|
| <b>Primary</b>   | $\beta$ -catenin (H-102)              | rabbit | 1:100                         | Santa Cruz Biotechnology (sc7199)    | IF          |
|                  | TCF7L2 (6H53)                         | mouse  | 1:400 / 1:100                 | MerckMillipore (05-511)              | IF          |
|                  | Lef1                                  | mouse  | 1:750                         | Produced in Prof. Richard Dorsky Lab | IF          |
|                  | PAX6 (Pax6a/b)                        | rabbit | 1:250                         | GeneTex (GTX128843)                  | WM/IF       |
|                  | anti-Acetylated Tubulin clone 6-11B-1 | mouse  | 1:100                         | Sigma-Aldrich (T 6793)               | WM/IF       |
|                  | anti-TCF7L2                           | rabbit | 1:100                         | Cell signalling (C48H11)             | IF (mouse)  |
|                  | anti-PAX6                             | rabbit | 1:200                         | Biolegend (901301)                   | IF (mouse)  |
|                  | anti-GAD1                             | mouse  | 1:500                         | Merck Millipore (MAB5406)            | IF (mouse)  |
| <b>Secondary</b> | anti-mouse Alexa 594                  | goat   | 1:200 / 1:800 / 1:500 (mouse) | Thermo Fisher (A-21203)              | WM/IF       |
|                  | anti-rabbit Alexa 488                 | goat   | 1:200 / 1:800 / 1:500 (mouse) | Thermo Fisher (A-21206)              | WM/IF       |

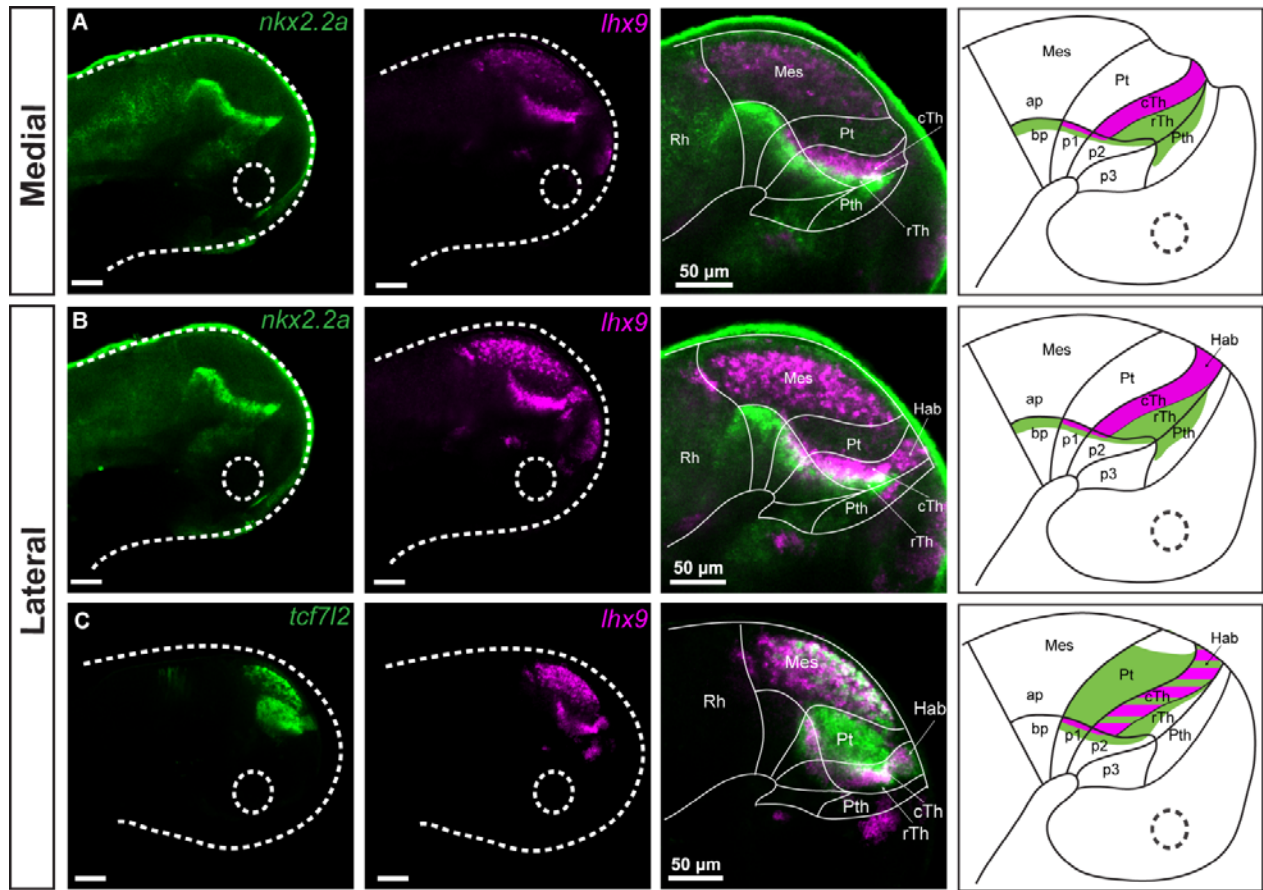

**Supplementary Figure 1. Identification of the alar-basal boundary in the diencephalon of 72 hpf zebrafish.** Confocal Z-stack images showing brain sections stained using the in situ hybridization with *nkx2.2a*, *lhx9* and *tcf7l2* probes. **(A-B)** Basal plate expression of *nkx2.2a* and *lhx9* delineates the alar-basal boundary in prosomere 1 in medial **(A)** and lateral **(B)** sections. *nkx2.2a* expression also identifies the rTh and Pth, while *lhx9* expression identifies the cTh and Hab (prosomere 2). **(C)** Co-staining of *tcf7l2* and *lhx9* identifies the border between prosomere 1 and 2 in the alar plate. Expression of *tcf7l2* marks the caudal border of the Pt. The schemes show regions identified by the markers in each merged image. Co-expression of *tcf7l2* and *lhx9* in **(C)** is represented by stripe pattern. ap – alar plate, bp – basal plate, Hab - habenula, Mes – mesencephalon, Pt - pretectum, p1 - prosomere 1, p2 - prosomere 2, p3 - prosomere 3, Pth - prethalamus, Rh – rhombencephalon, cTh- caudal thalamus, rTh - rostral thalamus

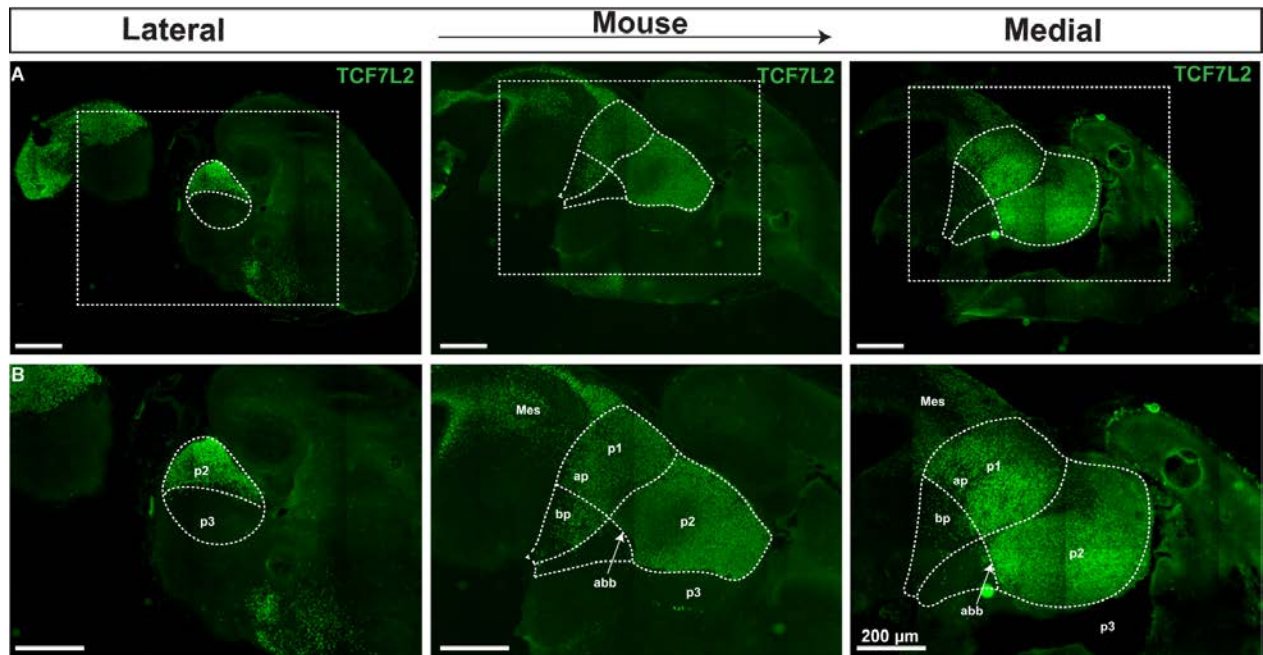

**Supplementary Figure 2. Identification of the pretectal boundaries in mouse embryos at E16.5.** Images of mouse sagittal brain sections immunostained with an antibody specific for TCF7L2. **(A)** medial to lateral view of the diencephalon shows TCF7L2 in prosomere 1 and 2 alar plate and the basal plate of prosomere 1. **(B)** High magnification images show the boundary between prosomere 2 and 3 in the lateral view and the border between prosomere 1 and 2 in the medial view. abb – alar basa plate boundary, ap – alar plate, bp – basal plate, Mes – mesencephalon, p1 - prosomere 1, p2 - prosomere 2, p3 - prosomere 3

48 hpf

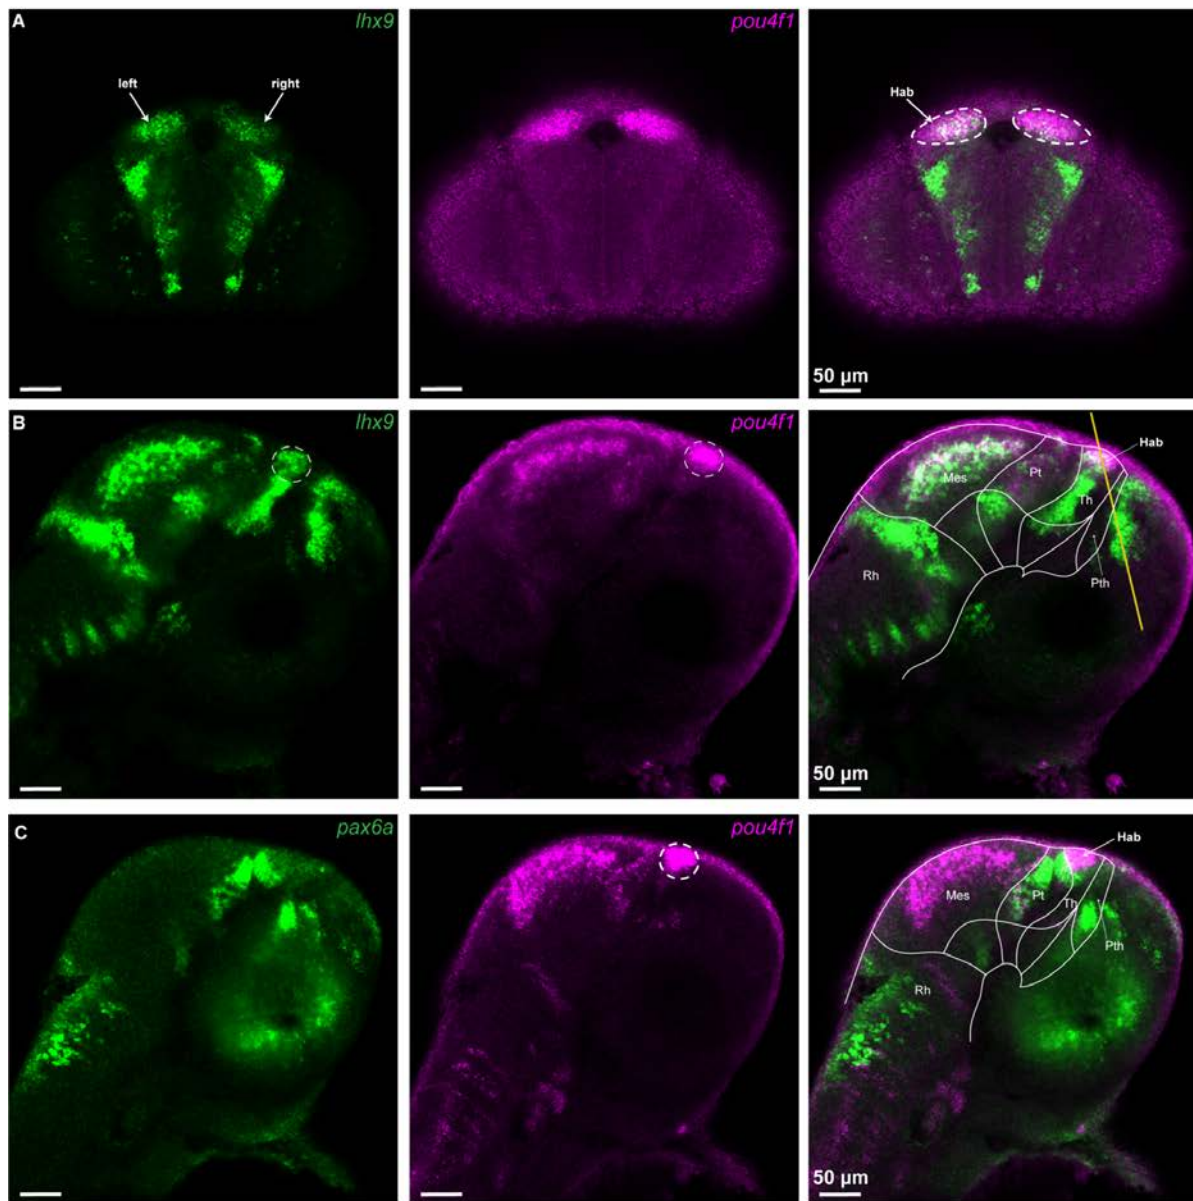

72 hpf

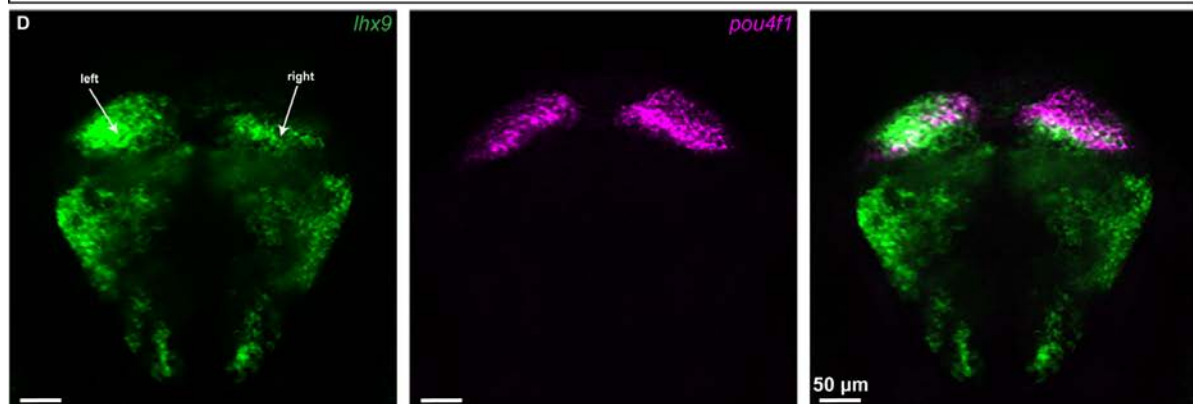

**Supplementary Figure 3. Identification of the habenula in the diencephalon of 48 hpf and 72 hpf zebrafish.** Confocal Z-stack images showing brain sections stained using in situ hybridization with *lhx9*, *pou4f1* and *pax6a* probes. **48 hpf:** (A) *lhx9* and *pou4f1* co-expression shows the localization of the habenula in the transverse section; in the habenula, *lhx9* is expressed asymmetrically. (B-C) Co-staining of *pou4f1* and *lhx9* (B) or *pax6a* (C) localizes the habenula in the dorsal part of prosomere 2 in the sagittal sections. **72 hpf:** (D) *lhx9* and *pou4f1* co-expression shows the localization of the habenula in the transverse section; the expression of *lhx9* in the habenula is strongly asymmetric. The yellow line in (B) show the sectioning plane of the transverse sections in (A) and (D). Hab - habenula, Th – thalamus, Mes – mesencephalon, Pt - pretectum, Pth - prethalamus, Rh – rhombencephalon



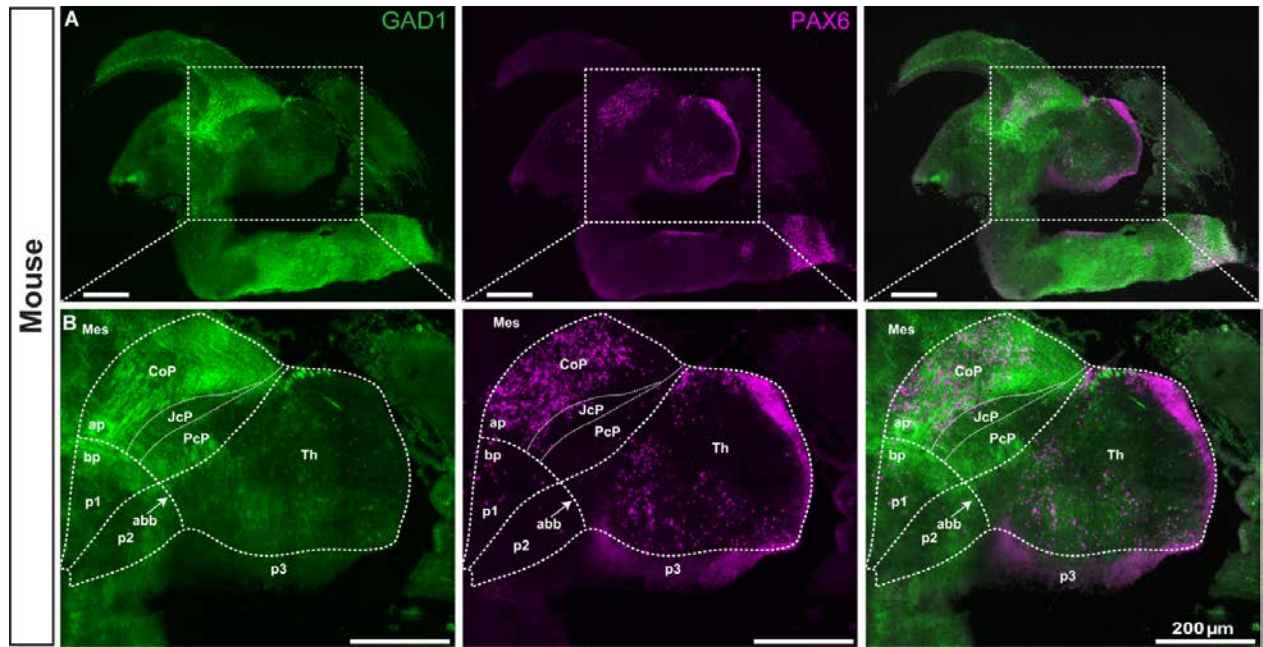

**Supplementary Figure 4. Expression of the GAD1 and PAX6 proteins in the mouse pretectum at E16.5.** Images of mouse sagittal brain sections immunostained with antibodies specific for GAD1 and PAX6. **(A-B)** PAX6 and GAD1 co-staining identifies the caudal boundary of prosomere 1 and rostral border of the CoP, indicated in high magnification images **(B)**. abb - alar-basal boundary, ap - alar plate, bp - basal plate, CoP - commissural pretectum, JcP - juxtacommissural pretectum, PcP - precommissural pretectum, Mes - mesencephalon, p1 - prosomere 1, p2 - prosomere 2, p3 - prosomere 3, Th - thalamus

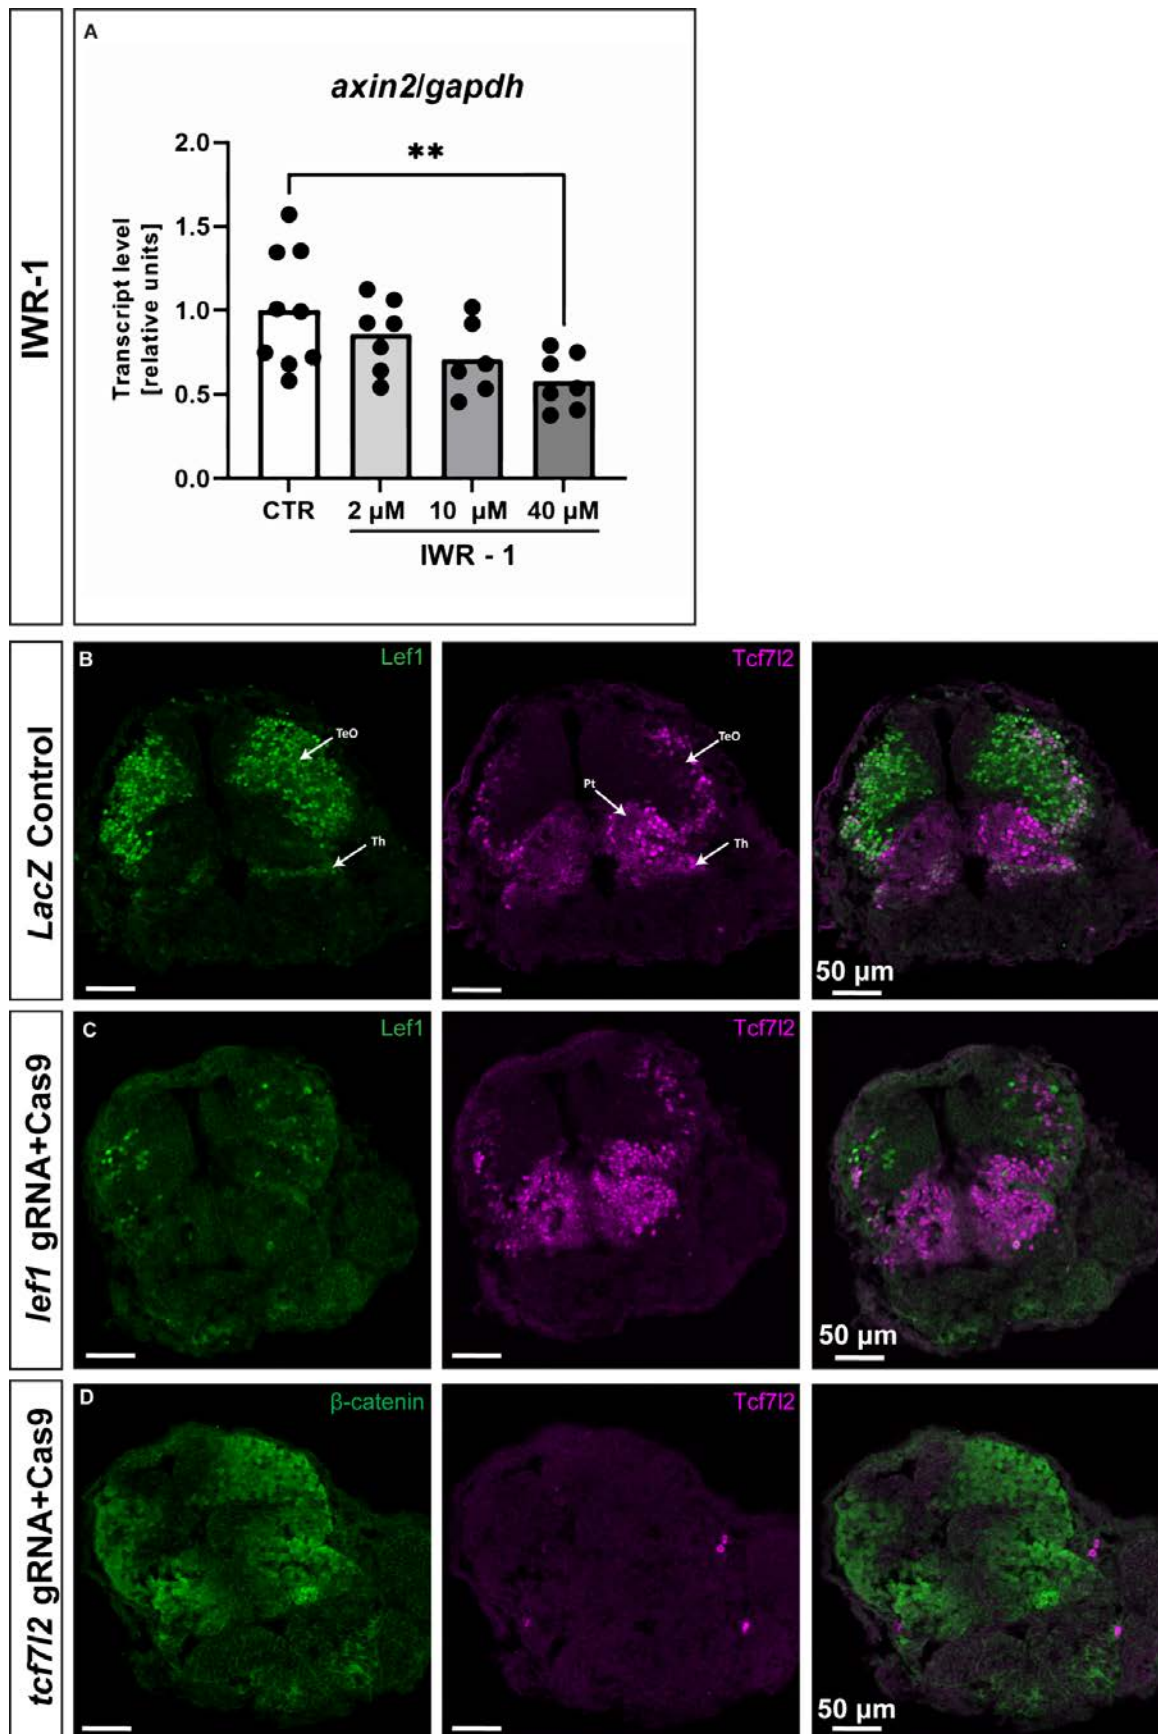



**Supplementary Figure 5. Validation of Wnt signalling inhibition by IWR-1 and efficiency of CRISPR/Cas9-mediated knockout of *lef1* and *tcf7l2* in zebrafish at 48 hpf.** RT-qPCR analysis of the expression of a classical Wnt pathway target *axin2* in zebrafish embryos treated with IWR-1-between 24 and 48 hpf, and images showing brain sections from F0 crispants immunostained with antibodies specific for Lef1 or Tcf7l2. **(A)** The downregulation of *axin2* indicates that Wnt signalling is inhibited by 24 h treatment with 40 uM IWR-1. **(B-D)** *lacZ* **(B)**, *lef1* **(C)** or *tcf7l2* **(D)** guide RNAs were injected into zebrafish zygotes. Lef1 is almost completely depleted in the brain of *lef1* crispant zebrafish (n=3), and Tcf7l2 is virtually absent in *tcf7l2* crispant zebrafish (n=4). Statistics in **(A)**: p=6-9; one-way ANOVA followed by Dunnett's *post hoc* test; \*\* p < 0.01

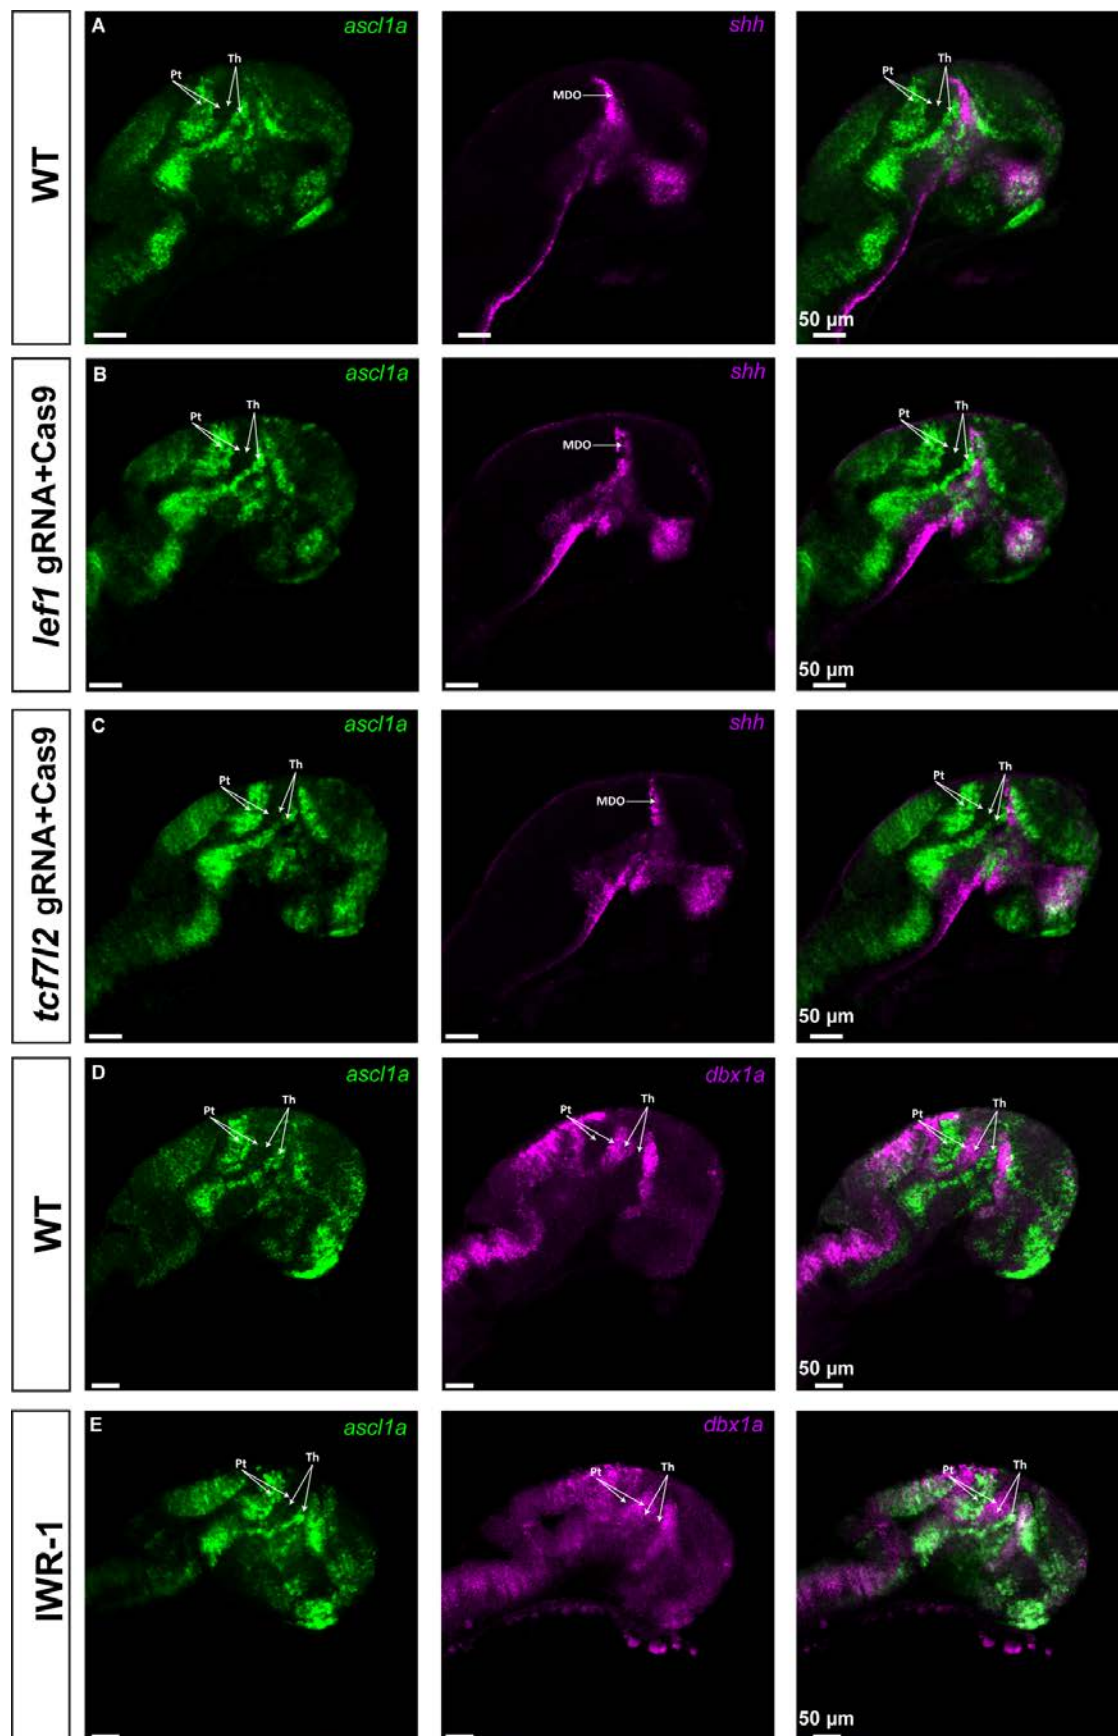

**Supplementary Figure 6. Patterning of progenitors in the diencephalon of IWR-1-treated, *lef1* crispant and *tcf7l2* crispant zebrafish at 30 hpf.**

Confocal Z-stack images showing brain sections of control, IWR-1-treated (24-30 hpf) and crispant zebrafish embryos stained using in situ hybridization with *ascl1a*, *shh1* and *dbx1a*. **(A-E)** *ascl1a* expression visualizes the pretectal progenitor domain. **(A-C)** *shh1* staining identifies MDO. **(D-E)** *dbx1a* expression visualizes the thalamic progenitor domain. The patterning of the diencephalon is not visibly affected by *lef1* **(B)** and *tcf7l2* knockout **(C)** or IWR-1 treatment **(E)** at the stage of 30 hpf. Pt - pretectum, MDO - mid-diencephalic organizer, Th – thalamus

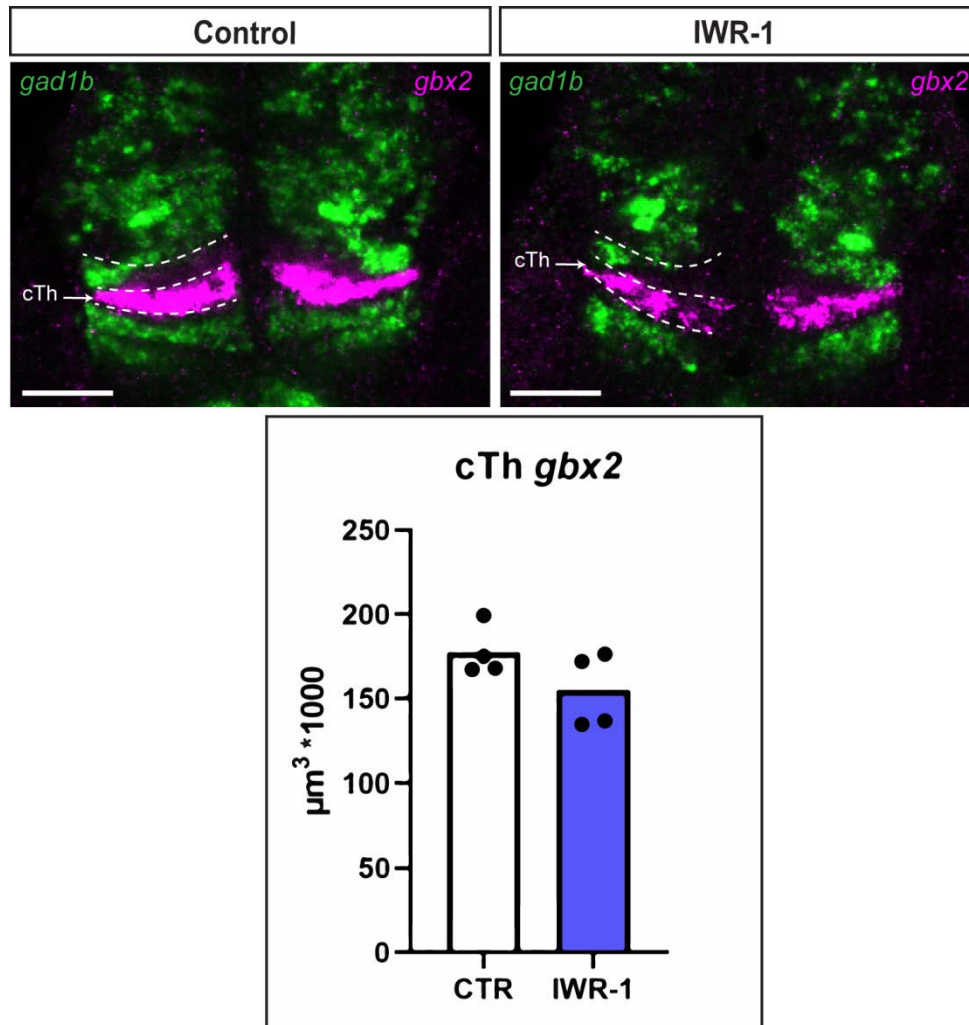

**Supplementary Figure 7. Phenotypes in the caudal thalamus and precommissural pretectum of IWR-1-treated zebrafish at 48 hpf.** Confocal Z-stack images showing brain sections stained using in situ hybridization with *gad1b* and *gbx2* probes. (A-B) The volume of the cTh is not changed by IWR-1-treatment between 24 and 48 hpf, indirectly indicating an expansion of the PcP (compare with Fig. 7). (C) The graph shows the volume quantification of cTh indicated in the previous images. Statistics in (C): n = 4; Paired t test. PcP - precommissural pretectum, cTh - caudal thalamus

## References

- Aizawa, H., Bianco, I. H., Hamaoka, T., Miyashita, T., Uemura, O., Concha, M. L., et al. (2005). Laterotopic representation of left-right information onto the dorso-ventral axis of a zebrafish midbrain target nucleus. *Curr Biol* 15, 238–243. doi:10.1016/j.cub.2005.01.014.
- Corallo, D., Schiavinato, A., Trapani, V., Moro, E., Argenton, F., and Bonaldo, P. (2013). Emilin3 is required for notochord sheath integrity and interacts with Scube2 to regulate notochord-derived Hedgehog signals. *Development* 140, 4594–4601. doi:10.1242/dev.094078.
- Dorsky, R. I., Snyder, A., Cretekos, C. J., Grunwald, D. J., Geisler, R., Haffter, P., and Raible, D. W. (1999). Maternal and embryonic expression of zebrafish *lef1*. *Mech Dev* 86(1-2), 147–150. doi:10.1016/s0925-4773(99)00101-x.
- Flasse, L. C., Stern, D. G., Pirson, J. L., Manfroid, I., Peers, B., and Voz, M. L. (2013). The bHLH transcription factor *Ascl1a* is essential for the specification of the intestinal secretory cells and mediates Notch signaling in the zebrafish intestine. *Dev Biol* 376, 187–197. doi:10.1016/j.ydbio.2013.01.011.
- Krauss, S., Concordet, J. P. and Ingham, P. W. (1993). A functionally conserved homolog of the *Drosophila* segment polarity gene *hh* is expressed in tissues with polarizing activity in zebrafish embryos. *Cell* 75, 1431–1444. doi: 10.1016/0092-8674(93)90628-4.
- Li, N., Felber, K., Elks, P., Croucher, P., and Roehl, H. H. (2009). Tracking gene expression during zebrafish osteoblast differentiation. *Dev Dyn* 238, 459–466. doi:10.1002/dvdy.21838.
- Peukert, D., Weber, S., Lumsden, A., and Scholpp, S. (2011). *Lhx2* and *Lhx9* determine neuronal differentiation and compartment in the caudal forebrain by regulating Wnt signaling. *PLoS Biol* 9, e1001218. doi:10.1371/journal.pbio.1001218.
- Scholpp, S., Delogu, A., Gilthorpe, J., Peukert, D., Schindler, S., and Lumsden, A. (2009). *Her6* regulates the neurogenetic gradient and neuronal identity in the thalamus. *Proc Natl Acad Sci U S A* 106, 19895–19900. doi:10.1073/pnas.0910894106.
- Seo, H. C., Saetre, B. O., Håvik, B., Ellingsen, S., and Fjose, A. (1998). The zebrafish *Pax3* and *Pax7* homologues are highly conserved, encode multiple isoforms and show dynamic segment-like expression in the developing brain. *Mech Dev* 70, 49–63. doi:10.1016/s0925-4773(97)00175-5.
- Veien, E. S., Rosenthal, J. S., Kruse-Bend, R. C., Chien, C. Bin, and Dorsky, R. I. (2008). Canonical Wnt signaling is required for the maintenance of dorsal retinal identity. *Development* 135, 4101–4111. doi:10.1242/dev.027367.
